# Supplementary material for: AC electric field controlled non-Newtonian filament thinning and droplet formation on the microscale
Source: Royal Society of Chemistry journal article supplement (doi:10.1039/c7lc00420f), 2017-01-01
Supplement: c7lc00420f12.pdf [file c7lc00420f12.pdf]

Supplementary information

# AC Electric Field Controlled Non-Newtonian Filament Thinning and Droplet Formations at Microscale

Y. Huang<sup>1</sup>, Y. L. Wang<sup>1</sup>, T. N. Wong<sup>1\*</sup>

<sup>1</sup>School of Mechanical and Aerospace Engineering, Nanyang Technological University  
50 Nanyang, Avenue, Singapore 639798,

\*Corresponding author. E-mail: [mtnwong@ntu.edu.sg](mailto:mtnwong@ntu.edu.sg), [hu0010yi@e.ntu.edu.sg](mailto:hu0010yi@e.ntu.edu.sg)

## Contents

|                                                                                            |    |
|--------------------------------------------------------------------------------------------|----|
| 1. Methods of applying the AC electric field.....                                          | 2  |
| 2. Material properties:.....                                                               | 3  |
| Viscosity of the fluids .....                                                              | 3  |
| Interfacial tension between the fluids.....                                                | 3  |
| Dielectric constant of the fluids (relative electric permittivity).....                    | 3  |
| 3. Calculation of the relaxation time $\lambda$ for the polymer solution .....             | 4  |
| 4. Merging of droplets under AC electric field in jetting regime .....                     | 5  |
| 5. Plots of droplet diameter as a function of applied voltage at various frequencies ..... | 6  |
| 6. Plots of droplet diameter as a function of frequency at various applied voltages.....   | 11 |
| 7. Caption list of the uploaded videos .....                                               | 14 |
| References .....                                                                           | 14 |

## 1. Methods of applying the AC electric field

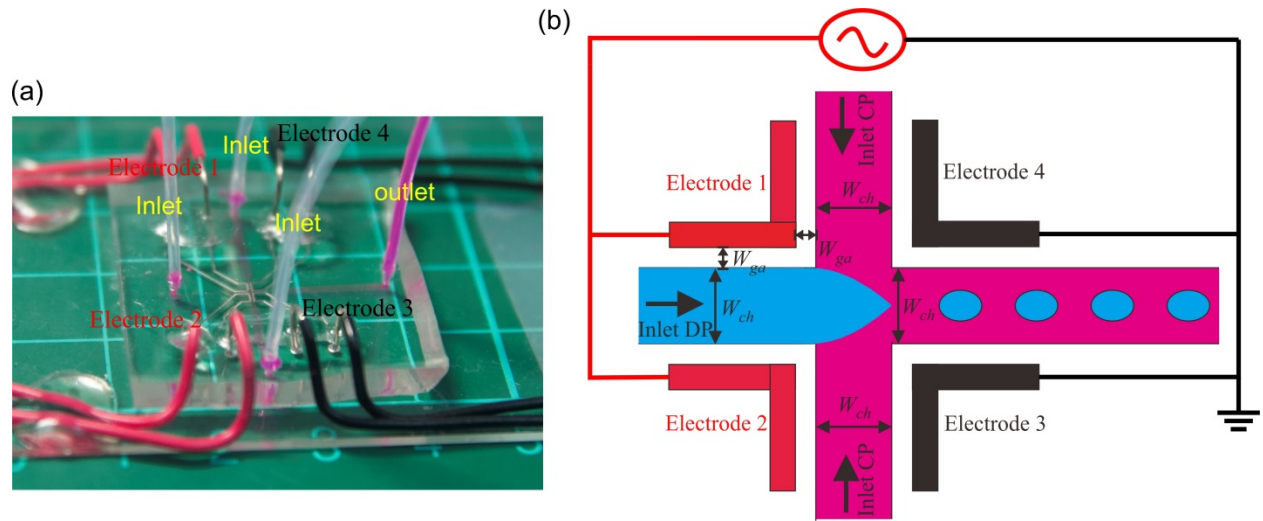

Figure S-1 Methods of applying AC electric fields through the microchannel. (a) The photo of the microchannel, (b) schematics of the electric circuit of implementing the AC electric field.

The methods of applying the AC electric field are shown in Figure S-1. As indicated both in (a) and (b), there are four electrodes all of which are connected with the electric wires. Among them, electrode 1 and 2 are connected to the high voltage amplifier where the high voltages with sine wave patterns are generated while the other two are grounded as indicated in (b).

## 2. Material properties:

### Viscosity of the fluids

Table S-1 Viscosity of the fluids

| Fluids                                    | Viscosity (mPa·s)            |
|-------------------------------------------|------------------------------|
| Mineral oil with 5% span 80               | 30.0                         |
| 63% w.t. Glycerol in DI water             | 10.5                         |
| PEO $M_w=4M$ , 0.5% w.t. aqueous solution | Shown in main text, Figure 3 |

The viscosities are measured by the TA Instruments Discovery Hybrid Rheometer (DHR-2).

### Interfacial tension between the fluids

Table S-2 Interfacial tension of the fluidic systems

| Fluidic systems                                                         | Interfacial tension (mN/m) |
|-------------------------------------------------------------------------|----------------------------|
| PEO $M_w=4M$ , 0.5% w.t. aqueous solution / Mineral oil with 5% span 80 | 18.0                       |
| 63% w.t. Glycerol in DI water / Mineral oil with 5% span 80             | 4.9                        |

The interfacial tension are measured by the tensiometer,model: FTA 200, using pendent droplet method.

### Dielectric constant of the fluids (relative electric permittivity)

Table S-3 dielectric constant of the fluids

| Fluids                                    | Relative permittivity $\epsilon_r$ |
|-------------------------------------------|------------------------------------|
| Mineral oil with 5% span 80               | 2.8                                |
| 63% w.t. Glycerol in DI water             | 46.3                               |
| PEO $M_w=4M$ , 0.5% w.t. aqueous solution | 891.0                              |

The dielectric constants of the fluids are measured by filling the fluids into a self-fabricated capacitor of cylindrical shape. The capacitances with and without the fluids are measured by a precision LCR meter (Keysight E4980AL). The relative permittivity can then be calculated by the formula of  $C = \epsilon_0 \epsilon_r A / d$ .

### 3. Calculation of the relaxation time $\lambda$ for the polymer solution

We utilize the approach indicated in Eq. (8), McKinley's review <sup>1</sup> which uses the filament thinning process and the formula  $\dot{\epsilon}_{mid} = -\frac{2}{R_{mid}} \frac{dR_{mid}}{dt} = \frac{2}{3\lambda}$  to estimate the relaxation time. From the filament thinning process, we can calculate the  $\dot{\epsilon}_{mid} \approx -\frac{2}{60} \cdot -0.855 \times 10^3 = \frac{2}{3\lambda}$ , therefore  $\lambda \approx 23.4$  ms. The slope of filament thinning is obtained by the linear curve fitting of the measured data as shown in the figure below.

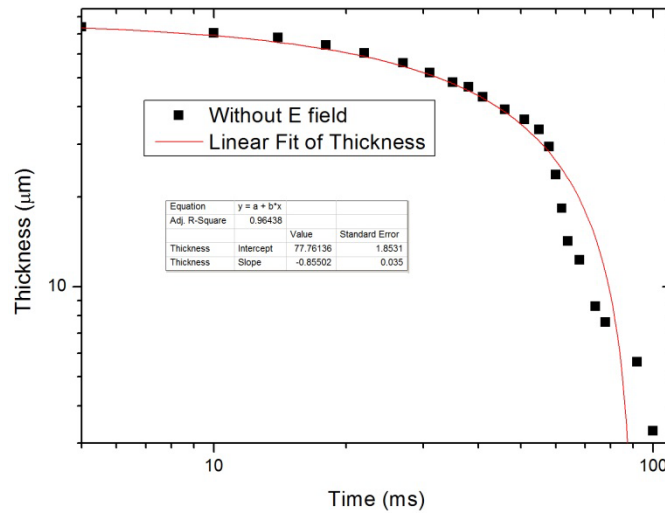

Figure S-2 Linear fitting for the slope of the filament thinning.

#### 4. Merging of droplets under AC electric field in jetting regime

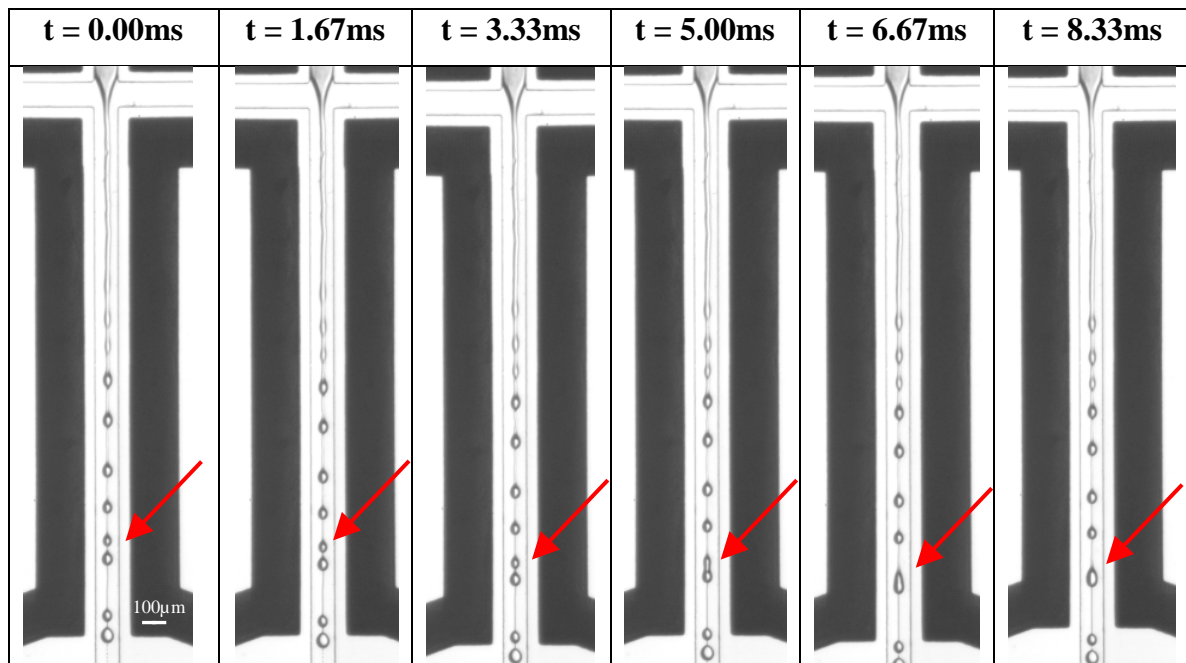

Figure S-3 Merging of droplets in jetting regime.  $Q_{DP}$ :  $Q_{CP}$ =20:160  $\mu\text{l/hr}$ , applied electric field: 750 V , 5KHz.

## 5. Plots of droplet diameter as a function of applied voltage at various frequencies

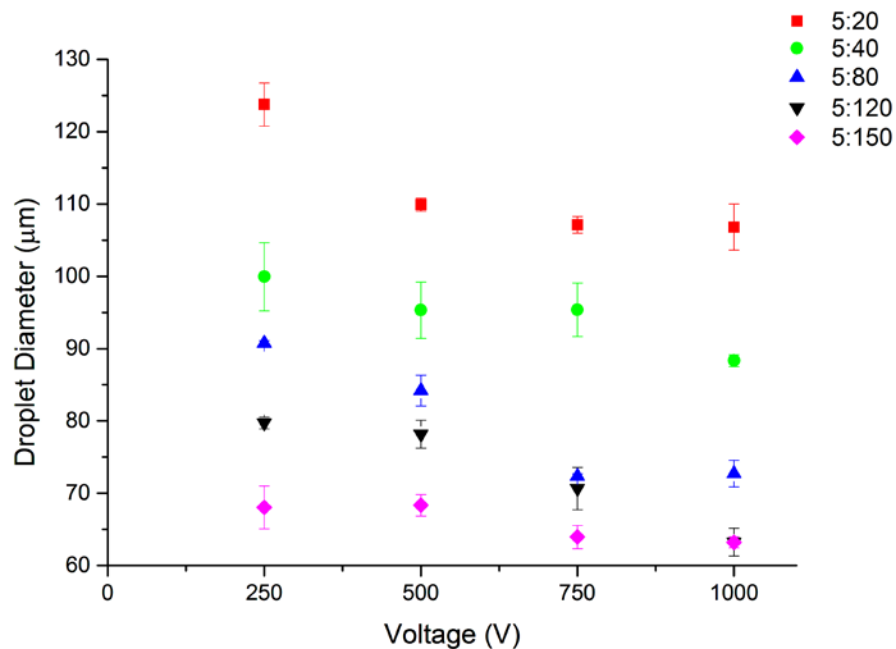

Figure S-4: Droplet diameter as a function of applied voltage at 500Hz where  $Q_{\text{PEO}}$  is  $5\mu\text{l/hr}$

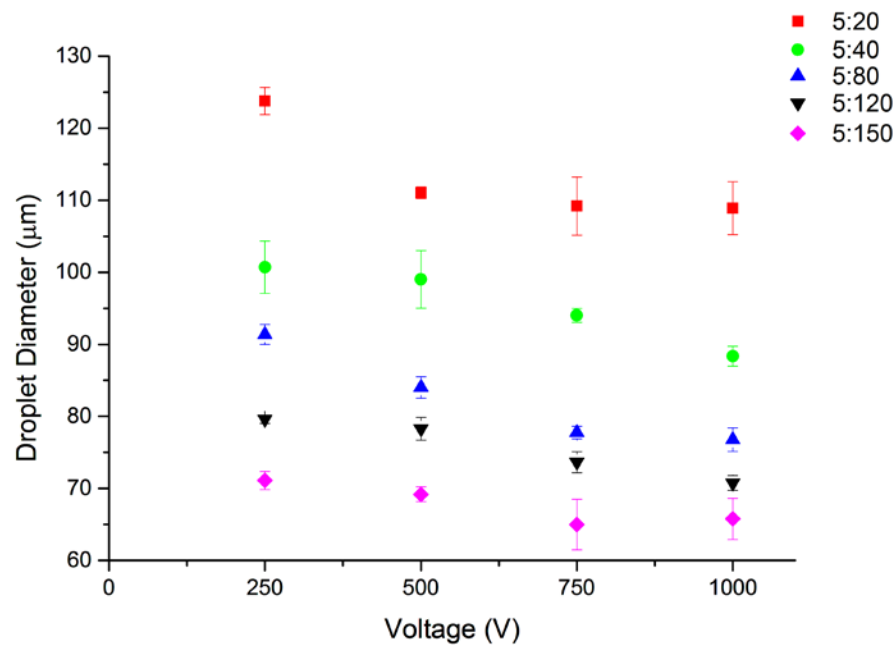

Figure S-5: Droplet diameter as a function of applied voltage at 1000Hz where  $Q_{\text{PEO}}$  is  $5\mu\text{l/hr}$

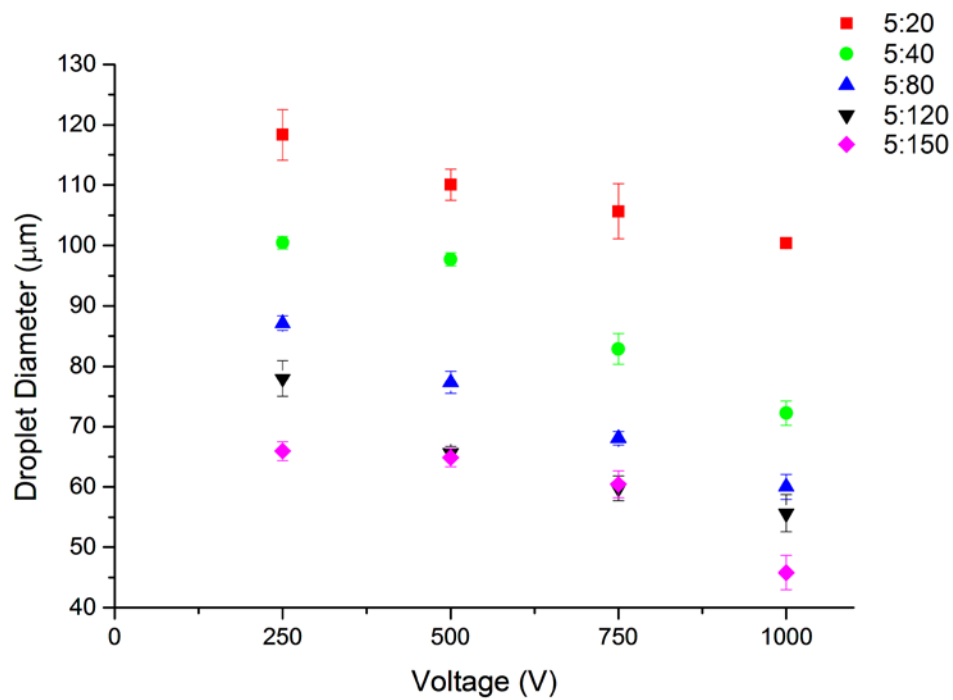

Figure S-6: Droplet diameter as a function of applied voltage at 5000Hz where  $Q_{PEO}$  is 5 $\mu$ l/hr

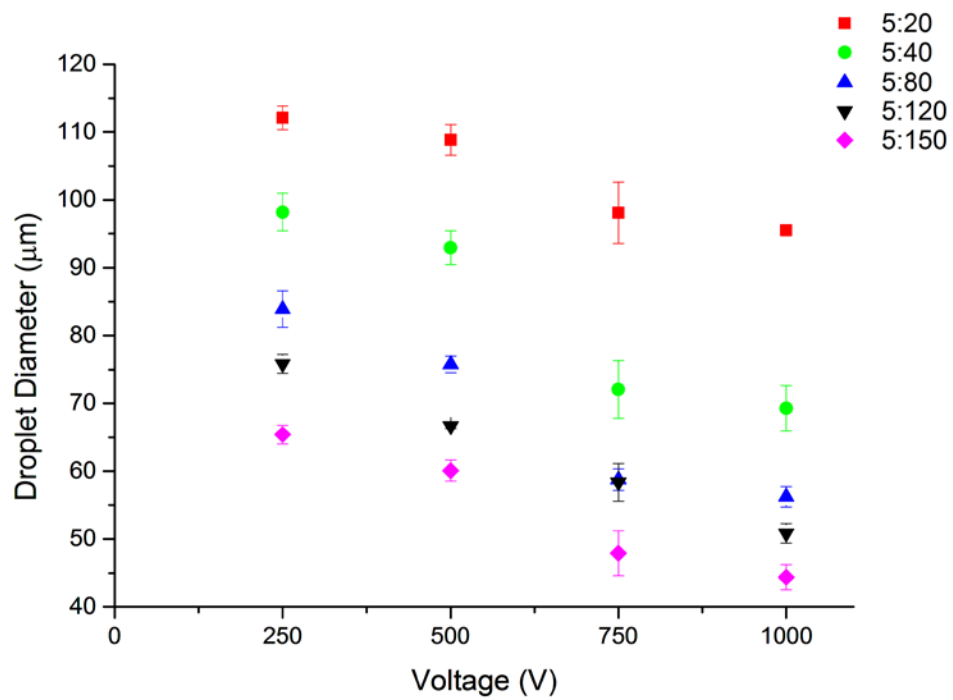

Figure S-7: Droplet diameter as a function of applied voltage at 7000Hz where  $Q_{PEO}$  is 5 $\mu$ l/hr

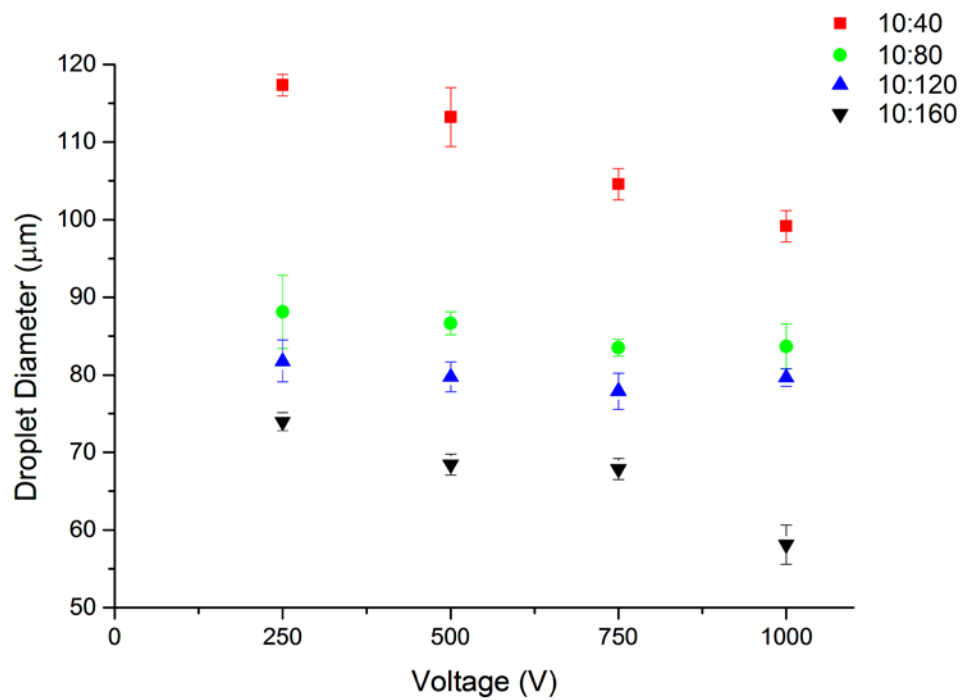

Figure S-8: Droplet diameter as a function of applied voltage at 500Hz where  $Q_{\text{PEO}}$  is  $10\mu\text{l/hr}$

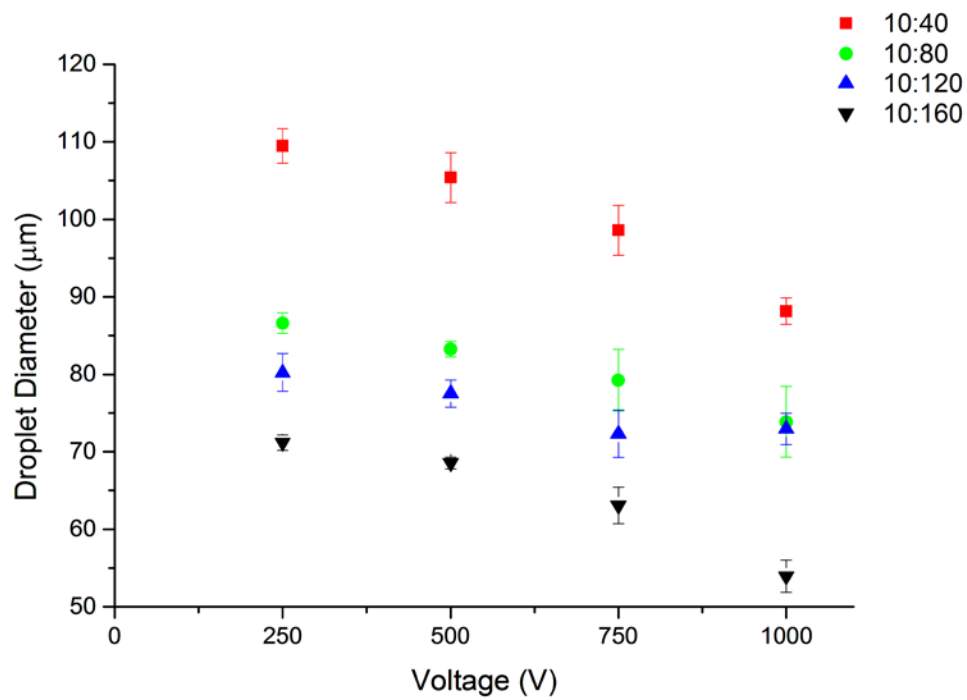

Figure S-9: Droplet diameter as a function of applied voltage at 2000Hz where  $Q_{\text{PEO}}$  is  $10\mu\text{l/hr}$



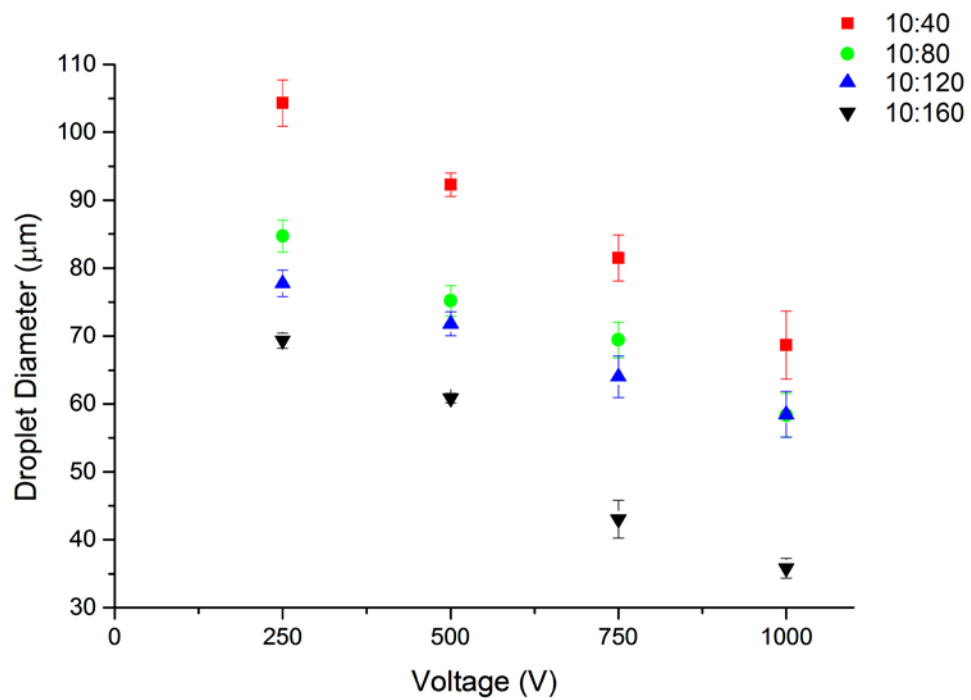

Figure S-10: Droplet diameter as a function of applied voltage at 7000Hz where  $Q_{\text{PEO}}$  is  $10\mu\text{l/hr}$

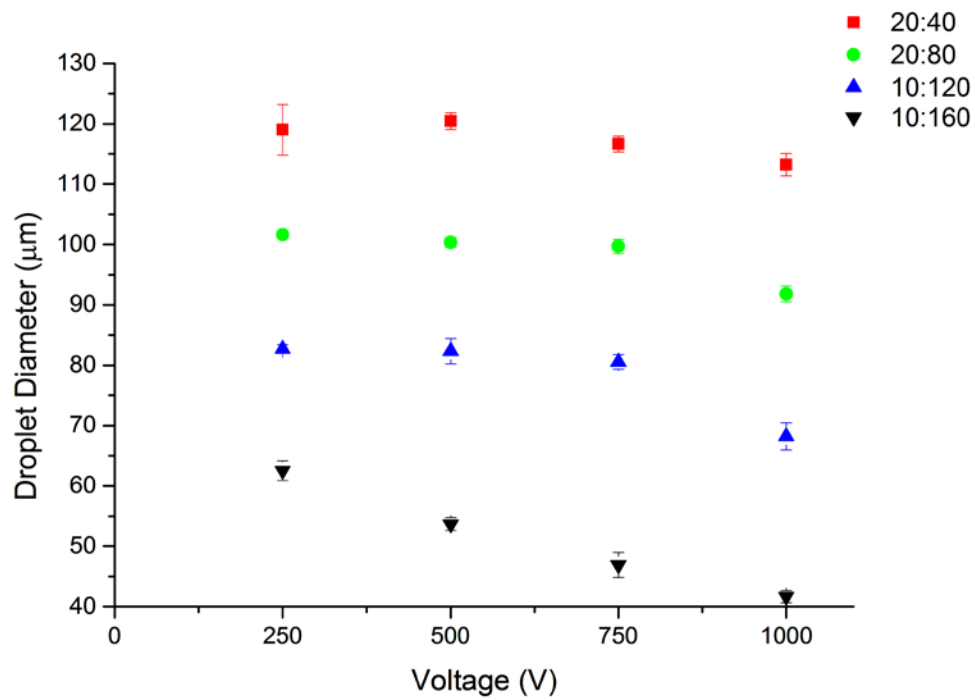

Figure S-11: Droplet diameter as a function of applied voltage at 1000Hz where  $Q_{\text{PEO}}$  is  $20\mu\text{l/hr}$

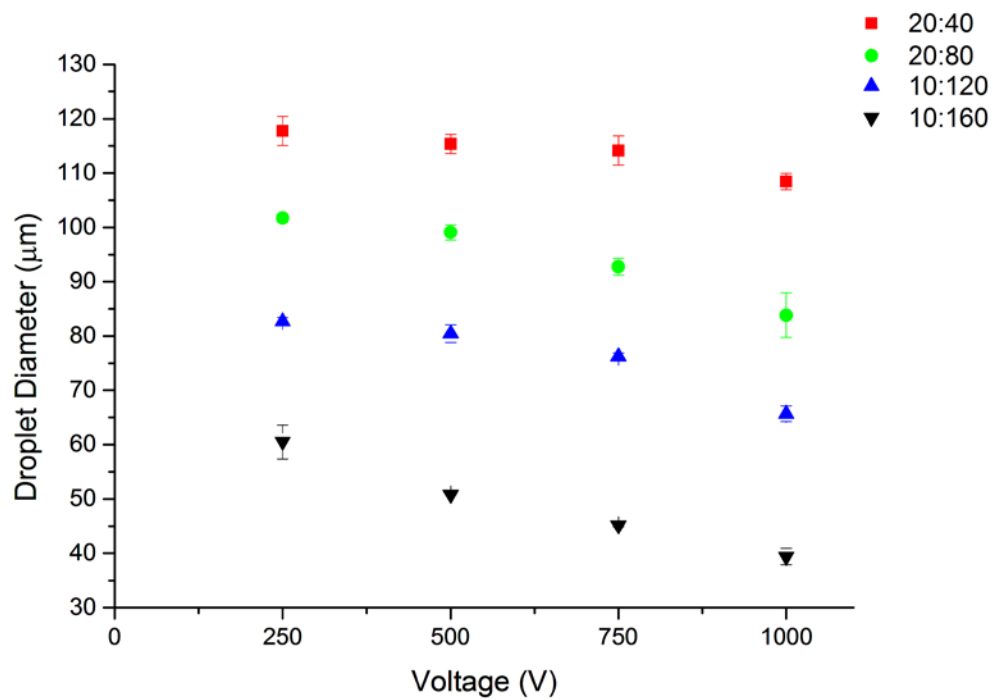

Figure S-12: Droplet diameter as a function of applied voltage at 2000Hz where  $Q_{\text{PEO}}$  is 20  $\mu\text{l/hr}$

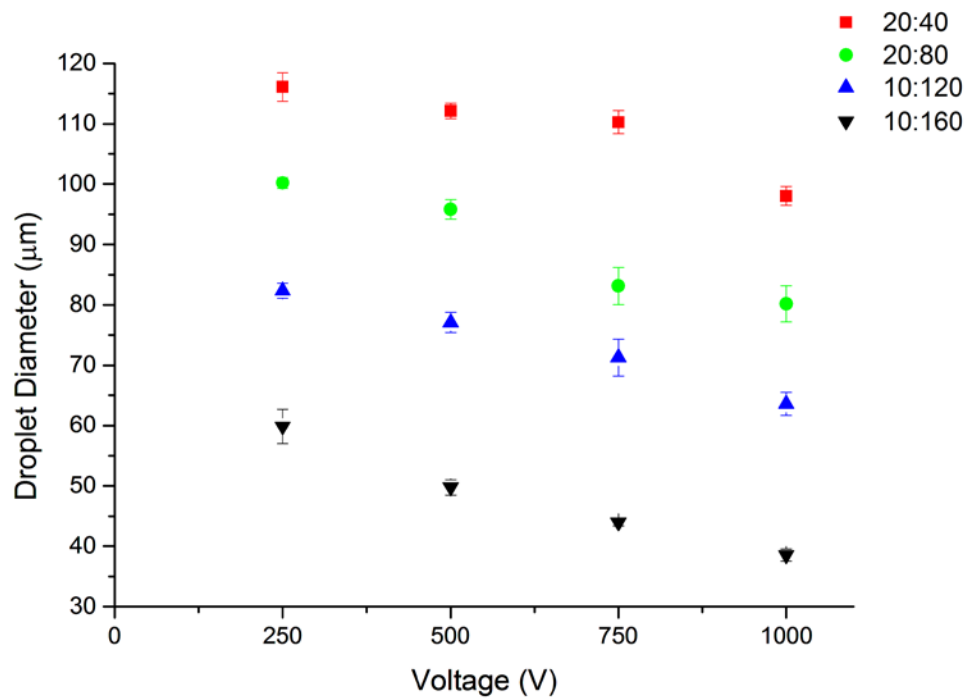

Figure S-13: Droplet diameter as a function of applied voltage at 5000Hz where  $Q_{\text{PEO}}$  is 20  $\mu\text{l/hr}$

## 6. Plots of droplet diameter as a function of frequency at various applied voltages

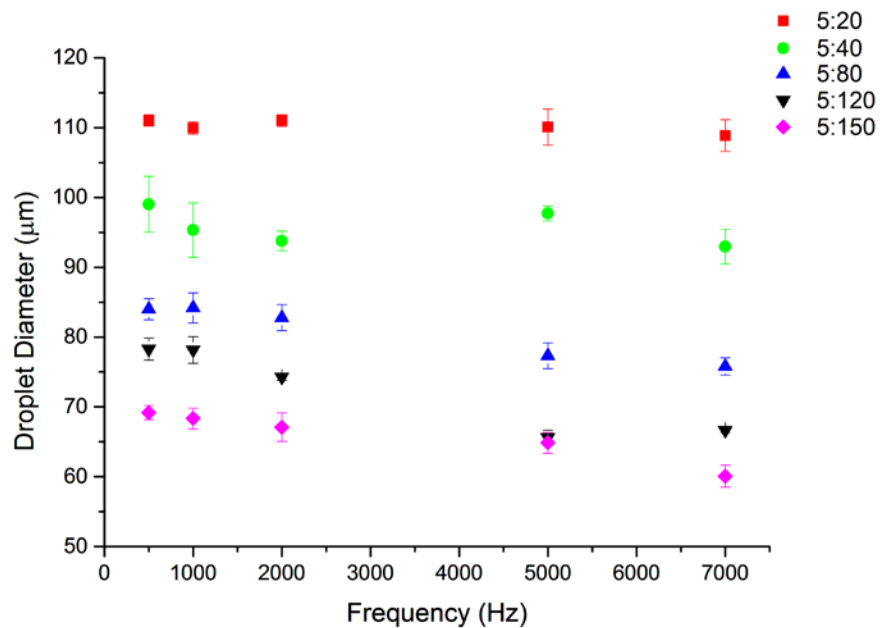

Figure S-14: Droplet diameter as a function of frequency at 500V where  $Q_{\text{PEO}}$  is  $5\mu\text{l/hr}$

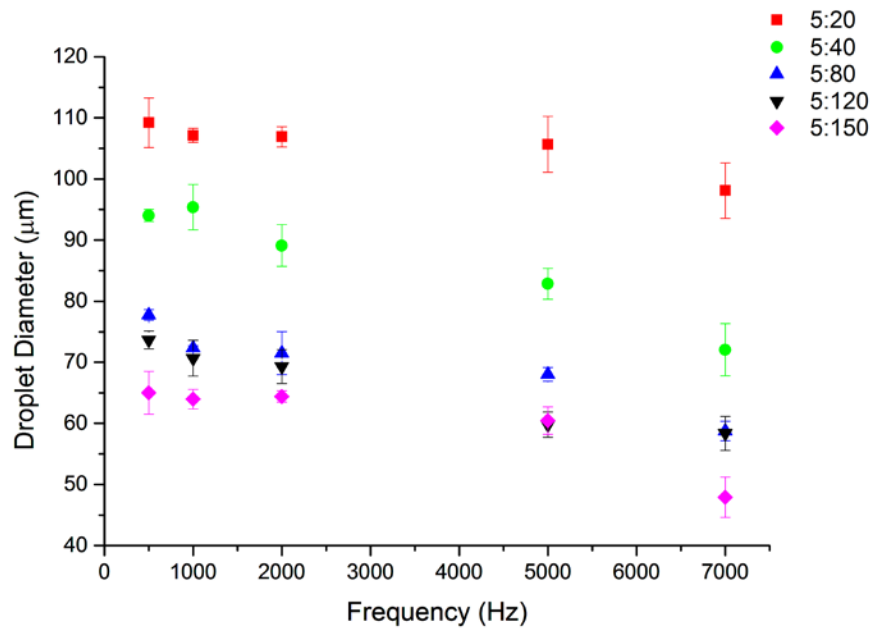

Figure S-15: Droplet diameter as a function of frequency at 750V where  $Q_{\text{PEO}}$  is  $5\mu\text{l/hr}$

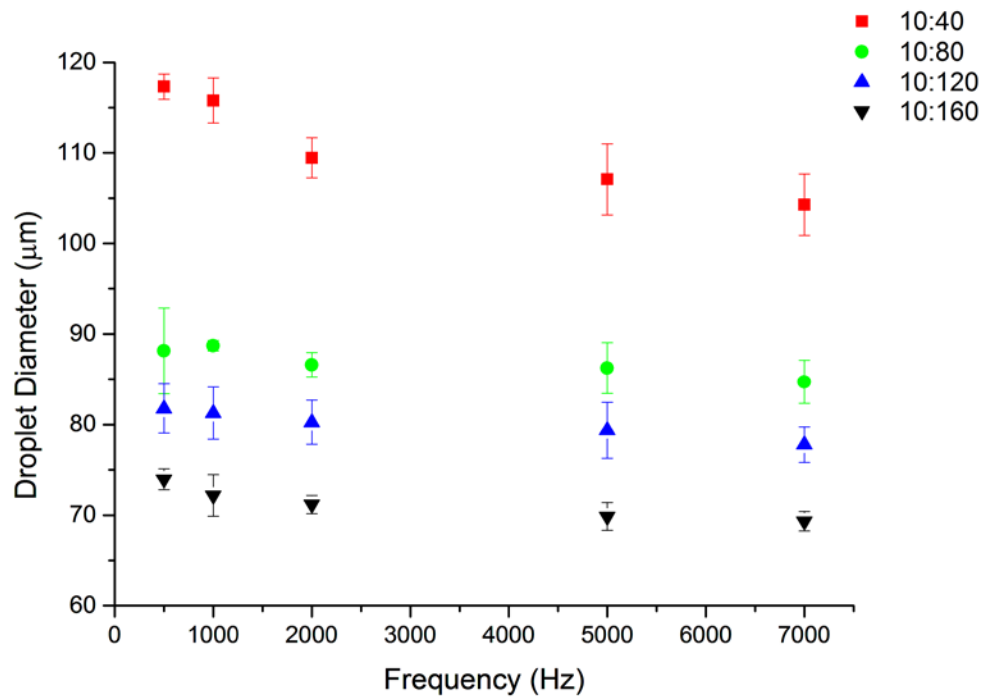

Figure S-16: Droplet diameter as a function of frequency at 250V where  $Q_{PEO}$  is 10 $\mu$ l/hr

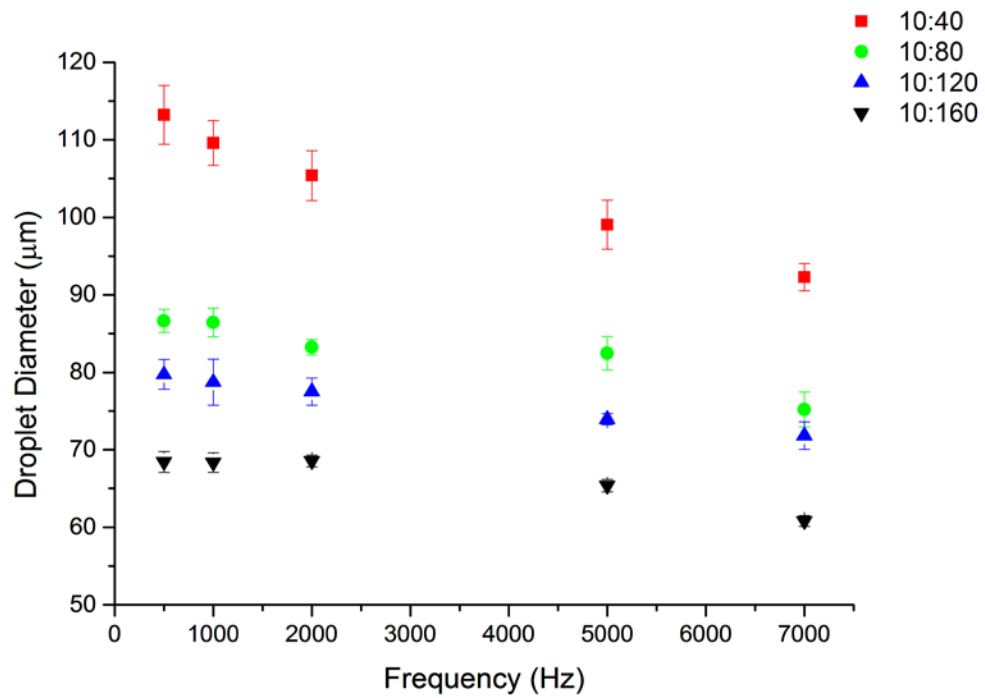

Figure S-17: Droplet diameter as a function of frequency at 500V where  $Q_{PEO}$  is 10 $\mu$ l/hr

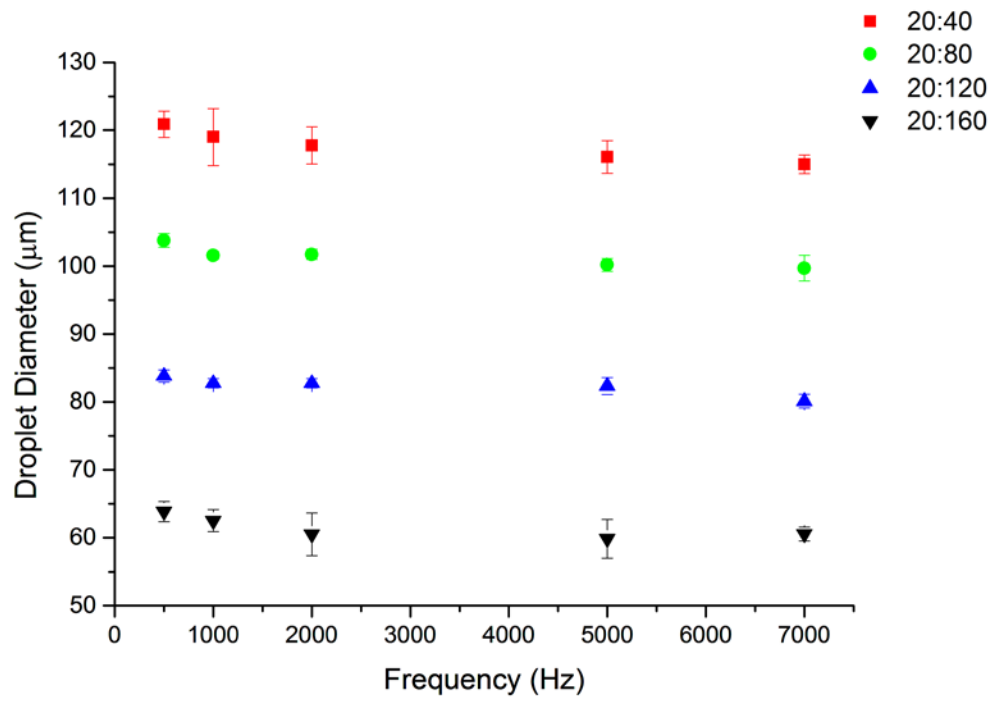

Figure S-18: Droplet diameter as a function of frequency at 250V where  $Q_{PEO}$  is 20 $\mu$ l/hr

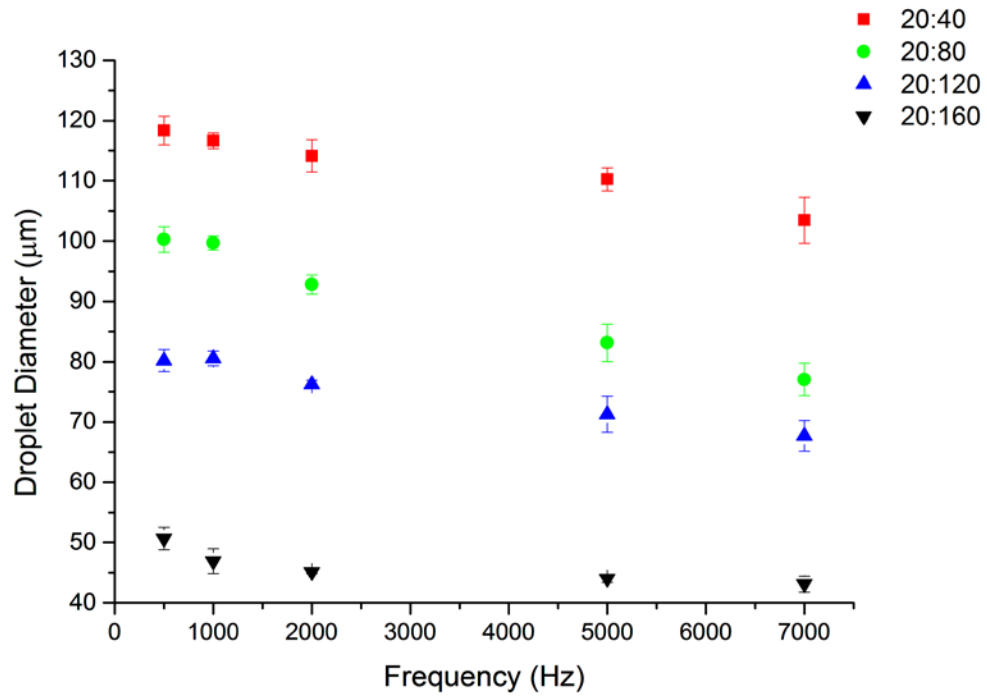

Figure S-19: Droplet diameter as a function of frequency at 750V where  $Q_{PEO}$  is 20 $\mu$ l/hr

## 7. Caption list of the uploaded videos

Table S-4 Caption list for the uploaded videos

| Video Name                   | Caption                                                                                                                                                                      | Capture speed (fps) |
|------------------------------|------------------------------------------------------------------------------------------------------------------------------------------------------------------------------|---------------------|
| S 1-1 without e field        | Non-Newtonian droplet breakup processes <i>without electric</i> field, Flow rates are $Q_{DP} : Q_{CP} = 10:40 \mu\text{L/hr}$                                               | 1000                |
| S 1-2 500 V 2K Hz            | Non-Newtonian droplet breakup processes under AC electric field of <b>500 V 2K</b> Hz, Flow rates are $Q_{DP} : Q_{CP} = 10:40 \mu\text{L/hr}$                               | 1000                |
| S 1-3 750 V 7K Hz            | Non-Newtonian droplet breakup processes under AC electric field of <b>750 V 7K</b> Hz, Flow rates are $Q_{DP} : Q_{CP} = 10:40 \mu\text{L/hr}$                               | 1000                |
| S 1-4 1 KV 7 K Hz            | Non-Newtonian droplet breakup processes under AC electric field of <b>1K V 7K</b> Hz, Flow rates are $Q_{DP} : Q_{CP} = 10:40 \mu\text{L/hr}$                                | 1000                |
| S 2-1 squeezing 750V 500Hz   | Non-Newtonian droplet formation in <i>squeezing</i> regime, under the AC electric field of 750V 500 Hz, Flow rates are $Q_{DP} : Q_{CP} = 10:40 \mu\text{L/hr}$              | 1000                |
| S 2-2 dripping 750V 500Hz    | Non-Newtonian droplet formation in <i>dripping</i> regime, under the AC electric field of 750V 500 Hz, Flow rates are $Q_{DP} : Q_{CP} = 10:160 \mu\text{L/hr}$              | 1000                |
| S 2-3 jetting 750V 7K Hz     | Non-Newtonian droplet formation in <i>jetting</i> regime, under the AC electric field of 750V 7K Hz, Flow rates are $Q_{DP} : Q_{CP} = 10:160 \mu\text{L/hr}$                | 1000                |
| S 3-1 fluorescent no field   | <b>Fluorescent</b> capturing of the non-Newtonian droplet formation, <i>without electric field</i> , Flow rates are $Q_{DP} : Q_{CP} = 10:40 \mu\text{L/hr}$                 | 1000                |
| S 3-2 fluorescent 1KV 1KHz   | <b>Fluorescent</b> capturing of the non-Newtonian droplet formation, with the AC electric field of <b>1KV 1K</b> Hz, Flow rates are $Q_{DP} : Q_{CP} = 10:40 \mu\text{L/hr}$ | 1000                |
| S 4-1 non-Newtonian 1kv 4kHz | Droplet formation tuned by AC electric field 1K V 4K Hz: the <i>non-Newtonian fluid</i>                                                                                      | 1000                |
| S 4-2 Newtonian 1kv 4kHz     | Droplet formation tuned by AC electric field 1K V 4K Hz: the <i>Newtonian fluid</i>                                                                                          | 1000                |

## References

1. G. H. McKinley, *Rheology Reviews*, 2005, **3**, 48.
